# Supplementary material for: State of the Art on the Evidence Base in Cardiac Regenerative Therapy: Overview of 41 Systematic Reviews
Source: Hindawi journal article supplement (doi:10.1155/2015/613782), 2015-01-01

**Supplementary appendix to Biondi-Zoccai et al, State of the art on the evidence base in cardiac regenerative therapy: overview of 41 systematic reviews**

## ONLINE REFERENCES

- Abdel-Latif A, Bolli R, Tleyjeh IM, Montori VM, Perin EC, Hornung CA, Zuba-Surma EK, Al-Mallah M, Dawn B. Adult bone marrow-derived cells for cardiac repair: a systematic review and meta-analysis. *Arch Intern Med* 2007;167:989-97.
- Alvarez PA, Schwarz ER, Ramineni R, Myatt P, Barbin C, Boissonnet C, Phan A, Maggioni A, Barbagelata A. Periprocedural adverse events in cell therapy trials in myocardial infarction and cardiomyopathy: a systematic review. *Clin Res Cardiol* 2013;102(1):1-10.
- Bai Y, Sun T, Ye P. Age, gender and diabetic status are associated with effects of bone marrow cell therapy on recovery of left ventricular function after acute myocardial infarction: a systematic review and meta-analysis. *Ageing Res Rev* 2010;9:418-23.
- Brunskill SJ, Hyde CJ, Doree CJ, Watt SM, Martin-Rendon E. Route of delivery and baseline left ventricular ejection fraction, key factors of bone-marrow-derived cell therapy for ischaemic heart disease. *Eur J Heart Fail* 2009;11:887-96.
- Cheng K, Wu F, Cao F. Intramyocardial autologous cell engraftment in patients with ischaemic heart failure: a meta-analysis of randomised controlled trials. *Heart Lung Circ* 2013;22:887-94.
- Clifford DM, Fisher SA, Brunskill SJ, Doree C, Mathur A, Clarke MJ, Watt SM, Martin-Rendon E. Long-term effects of autologous bone marrow stem cell treatment in acute myocardial infarction: factors that may influence outcomes. *PLoS One* 2012;7:e37373.
- de Jong R, Houtgraaf JH, Samiei S, Boersma E, Duckers HJ. Intracoronary stem cell infusion after acute myocardial infarction: a meta-analysis and update on clinical trials. *Circ Cardiovasc Interv* 2014;7:156-67.
- Delewi R, Hirsch A, Tijssen JG, Schächinger V, Wojakowski W, Roncalli J, Aakhus S, Erbs S, Assmus B, Tendera M, Goekmen Turan R, Corti R, Henry T, Lemarchand P, Lunde K, Cao F, Huikuri HV, Sürder D, Simari RD, Janssens S, Wollert KC, Plewka M, Grajek S, Traverse JH, Zijlstra F, Piek JJ. Impact of intracoronary bone marrow cell therapy on left ventricular function in the setting of ST-segment elevation myocardial infarction: a collaborative meta-analysis. *Eur Heart J* 2014;35:989-98.
- Delewi R, Andriessen A, Tijssen JG, Zijlstra F, Piek JJ, Hirsch A. Impact of intracoronary cell therapy on left ventricular function in the setting of acute myocardial infarction: a meta-analysis of randomised controlled clinical trials. *Heart* 2013;99:225-32.
- Donndorf P, Kundt G, Kaminski A, Yerebakan C, Liebold A, Steinhoff G, Glass A. Intramyocardial bone marrow stem cell transplantation during coronary artery bypass surgery: a meta-analysis. *J Thorac Cardiovasc Surg* 2011;142:911-20.
- Fan L, Chen L, Chen X, Fu F. A meta-analysis of stem cell mobilization by granulocyte colony-stimulating factor in the treatment of acute myocardial infarction. *Cardiovasc Drugs Ther* 2008;22:45-54.

- Fisher SA, Dorée C, Brunskill SJ, Mathur A, Martin-Rendon E. Bone Marrow Stem Cell Treatment for Ischemic Heart Disease in Patients with No Option of Revascularization: A Systematic Review and Meta-Analysis. *PLoS One* 2013;8:e64669.
- Fisher SA, Brunskill SJ, Doree C, Mathur A, Taggart DP, Martin-Rendon E. Stem cell therapy for chronic ischaemic heart disease and congestive heart failure. *Cochrane Database Syst Rev* 2014;4:CD007888.
- Henry TD, Grines CL, Watkins MW, Dib N, Barbeau G, Moreadith R, Andrasfay T, Engler RL. Effects of Ad5FGF-4 in patients with angina: an analysis of pooled data from the AGENT-3 and AGENT-4 trials. *J Am Coll Cardiol* 2007;50:1038-46.
- Hristov M, Heussen N, Schober A, Weber C. Intracoronary infusion of autologous bone marrow cells and left ventricular function after acute myocardial infarction: a meta-analysis. *J Cell Mol Med* 2006;10:727-33.
- Ince H, Valgimigli M, Petzsch M, de Lezo JS, Kuethe F, Dunkelmann S, Biondi-Zoccai G, Nienaber CA. Cardiovascular events and re-stenosis following administration of G-CSF in acute myocardial infarction: systematic review and meta-analysis. *Heart* 2008;94:610-6.
- Jeevanantham V, Butler M, Saad A, Abdel-Latif A, Zuba-Surma EK, Dawn B. Adult bone marrow cell therapy improves survival and induces long-term improvement in cardiac parameters: a systematic review and meta-analysis. *Circulation* 2012;126:551-68.
- Jiang M, He B, Zhang Q, Ge H, Zang MH, Han ZH, Liu JP, Li JH, Zhang Q, Li HB, Jin Y, He Q, Gong XR, Yin XY. Randomized controlled trials on the therapeutic effects of adult progenitor cells for myocardial infarction: meta-analysis. *Expert Opin Biol Ther* 2010;10:667-80.
- Jiang M, Mao J, He B. The effect of bone marrow-derived cells on diastolic function and exercise capacity in patients after acute myocardial infarction. *Stem Cell Res* 2012;9:49-57.
- Kandala J, Upadhyay GA, Pokushalov E, Wu S, Drachman DE, Singh JP. Meta-analysis of stem cell therapy in chronic ischemic cardiomyopathy. *Am J Cardiol* 2013;112:217-25.
- Kang S, Yang Y, Li CJ, Gao R. Effectiveness and tolerability of administration of granulocyte colony-stimulating factor on left ventricular function in patients with myocardial infarction: a meta-analysis of randomized controlled trials. *Clin Ther* 2007;29:2406-18.
- Kang S, Yang YJ, Li CJ, Gao RL. Effects of intracoronary autologous bone marrow cells on left ventricular function in acute myocardial infarction: a systematic review and meta-analysis for randomized controlled trials. *Coron Artery Dis* 2008;19:327-35.
- Kuswardhani RA, Soejitno A. Bone marrow-derived stem cells as an adjunctive treatment for acute myocardial infarction: a systematic review and meta-analysis. *Acta Med Indones* 2011;43:168-77.

Li N, Yang YJ, Zhang Q, Jin C, Wang H, Qian HY. Stem cell therapy is a promising tool for refractory angina: a meta-analysis of randomized controlled trials. *Can J Cardiol* 2013;29:908-14.

Lipinski MJ, Biondi-Zoccai GG, Abbate A, Khianey R, Sheiban I, Bartunek J, Vanderheyden M, Kim HS, Kang HJ, Strauer BE, Vetrovec GW. Impact of intracoronary cell therapy on left ventricular function in the setting of acute myocardial infarction: a collaborative systematic review and meta-analysis of controlled clinical trials. *J Am Coll Cardiol* 2007;50:1761-7.

Martin-Rendon E, Brunskill SJ, Hyde CJ, Stanworth SJ, Mathur A, Watt SM. Autologous bone marrow stem cells to treat acute myocardial infarction: a systematic review. *Eur Heart J* 2008;29:1807-18.

Moazzami K, Roohi A, Moazzami B. Granulocyte colony stimulating factor therapy for acute myocardial infarction. *Cochrane Database Syst Rev* 2013;5:CD008844.

Nowbar AN, Mielewczik M, Karavassilis M, Dehbi HM, Shun-Shin MJ, Jones S, Howard JP, Cole GD, Francis DP; DAMASCENE writing group. Discrepancies in autologous bone marrow stem cell trials and enhancement of ejection fraction (DAMASCENE): weighted regression and meta-analysis. *BMJ*. 2014;348:g2688.

Singh S, Arora R, Handa K, Khraisat A, Nagajothi N, Molnar J, Khosla S. Stem cells improve left ventricular function in acute myocardial infarction. *Clin Cardiol* 2009;32:176-80.

Sun L, Zhang T, Lan X, Du G. Effects of stem cell therapy on left ventricular remodeling after acute myocardial infarction: a meta-analysis. *Clin Cardiol* 2010;33:296-302.

Takagi H, Umemoto T. Intracoronary stem cell injection improves left ventricular remodeling after acute myocardial infarction: an updated meta-analysis of randomized trials. *Int J Cardiol* 2011;151:226-8.

Tian T, Chen B, Xiao Y, Yang K, Zhou X. Intramyocardial autologous bone marrow cell transplantation for ischemic heart disease: a systematic review and meta-analysis of randomized controlled trials. *Atherosclerosis* 2014;233:485-92.

Wen Y, Meng L, Ding Y, Ouyang J. Autologous transplantation of blood-derived stem/progenitor cells for ischaemic heart disease. *Int J Clin Pract* 2011;65:858-65.

Wen Y, Meng L, Xie J, Ouyang J. Direct autologous bone marrow-derived stem cell transplantation for ischemic heart disease: a meta-analysis. *Expert Opin Biol Ther* 2011;11:559-67.

Xu R, Ding S, Zhao Y, Pu J, He B. Autologous Transplantation of Bone Marrow/Blood-Derived Cells for Chronic Ischemic Heart Disease: A Systematic Review and Meta-analysis. *Can J Cardiol* 2014 Jan 23. [Epub ahead of print].

Zhang S, Sun A, Xu D, Yao K, Huang Z, Jin H, Wang K, Zou Y, Ge J. Impact of timing on efficacy and safety of intracoronary autologous bone marrow stem cells transplantation in acute myocardial

infarction: a pooled subgroup analysis of randomized controlled trials. Clin Cardiol 2009;32:458-66.

Zhang SN, Sun AJ, Ge JB, Yao K, Huang ZY, Wang KQ, Zou YZ. Intracoronary autologous bone marrow stem cells transfer for patients with acute myocardial infarction: a meta-analysis of randomised controlled trials. Int J Cardiol 2009;136:178-85.

Zhang C, Sun A, Zhang S, Yao K, Wu C, Fu M, Wang K, Zou Y, Ge J. Efficacy and safety of intracoronary autologous bone marrow-derived cell transplantation in patients with acute myocardial infarction: insights from randomized controlled trials with 12 or more months follow-up. Clin Cardiol 2010;33:353-60.

Zhao Q, Ye X. Additive value of adult bone-marrow-derived cell transplantation to conventional revascularization in chronic ischemic heart disease: a systemic review and meta-analysis. Expert Opin Biol Ther 2011;11:1569-79.

Zimmet H, Porapakham P, Porapakham P, Sata Y, Haas SJ, Itescu S, Forbes A, Krum H. Short- and long-term outcomes of intracoronary and endogenously mobilized bone marrow stem cells in the treatment of ST-segment elevation myocardial infarction: a meta-analysis of randomized control trials. Eur J Heart Fail 2012;14:91-105.

Zohlnhöfer D, Dibra A, Koppara T, de Waha A, Ripa RS, Kastrup J, Valgimigli M, Schömig A, Kastrati A. Stem cell mobilization by granulocyte colony-stimulating factor for myocardial recovery after acute myocardial infarction: a meta-analysis. J Am Coll Cardiol 2008;51:1429-37.

## ONLINE TABLES

**Table 1S.** Included reviews.

| First author (acronym) | Journal                    | Journal impact factor | Year of publication | PubMed ID | Studies included | Patients included |
|------------------------|----------------------------|-----------------------|---------------------|-----------|------------------|-------------------|
| Abdel-Latif            | Arch Intern Med            | >10                   | 2007                | 17533201  | 18               | 999               |
| Alvarez                | Clin Res Cardiol           | 1-5                   | 2012                | 23052331  | 35               | 2472              |
| Bai                    | Ageing Res Rev             | 5-10                  | 2010                | 20471500  | 10               | 850               |
| Brunskill              | Eur J Heart Fail           | 5-10                  | 2009                | 19654139  | 21               | 1091              |
| Cheng                  | Heart Lung Circ            | 1-5                   | 2013                | 23806195  | 5                | 210               |
| Clifford               | PLoS One                   | 1-5                   | 2012                | 22655042  | 33               | 1765              |
| de Jong                | Circ Cardiovasc Interv     | 5-10                  | 2014                | 24668227  | 30               | 2037              |
| Delewi                 | Heart                      | 5-10                  | 2012                | 22875736  | 24               | 1624              |
| Delewi                 | Eur Heart J                | >10                   | 2013                | 24026778  | 16               | 1641              |
| Donndorf               | J Thorac Cardiovasc Surg   | 1-5                   | 2011                | 21376346  | 6                | 179               |
| Fan                    | Cardiovasc Drugs Ther      | 1-5                   | 2007                | 18000749  | 6                | 320               |
| Fisher                 | PLoS One                   | 1-5                   | 2013                | 23840302  | 9                | 659               |
| Fisher                 | Cochrane Database Syst Rev | 5-10                  | 2014                | 24777540  | 23               | 1255              |
| Henry                  | J Am Coll Cardiol          | >10                   | 2007                | 17825712  | 2                | 532               |
| Hristow                | J Cell Mol Med             | 1-5                   | 2006                | 16989732  | 5                | 482               |
| Ince                   | Heart                      | 5-10                  | 2007                | 17761504  | 7                | 325               |
| Jeevanantham           | Circulation                | >10                   | 2012                | 22730444  | 50               | 2625              |
| Jiang                  | Expert Opin Biol Ther      | 1-5                   | 2010                | 20384520  | 18               | 980               |
| Jiang                  | Stem Cell Res              | 1-5                   | 2012                | 22640927  | 6                | 365               |
| Kandala                | Am J Cardiol               | 1-5                   | 2013                | 23623290  | 10               | 519               |
| Kang                   | Clin Ther                  | 1-5                   | 2007                | 18158081  | 7                | 364               |
| Kang                   | Coron Artery Dis           | 1-5                   | 2008                | 18607170  | 6                | 517               |
| Kuswardhani            | Acta Med Indones           | <1                    | 2011                | 21979282  | 10               | 906               |
| Li                     | Can J Cardiol              | 1-5                   | 2013                | 23465346  | 5                | 381               |
| Lipinski               | J Am Coll Cardiol          | >10                   | 2007                | 17964040  | 10               | 698               |
| Martin-Rendon          | Eur Heart J                | >10                   | 2008                | 18523058  | 13               | 811               |
| Moazzami               | Cochrane Database Syst Rev | 5-10                  | 2013                | 23728682  | 7                | 354               |
| Nowbar (DAMASCENE)     | BMJ                        | >10                   | 2014                | 24778175  | 49               | NA                |
| Singh                  | Clin Cardiol               | 1-5                   | 2009                | 19353705  | 7                | 516               |
| Sun                    | Clin Cardiol               | 1-5                   | 2010                | 20513068  | 11               | 832               |
| Takagi                 | Int J Cardiol              | 5-10                  | 2011                | 21641056  | 15               | 877               |
| Tian                   | Atherosclerosis            | 1-5                   | 2014                | 24530783  | 11               | 492               |

|           |                       |      |      |          |    |      |
|-----------|-----------------------|------|------|----------|----|------|
| Wen       | Expert Opin Biol Ther | 1-5  | 2011 | 21388335 | 8  | 307  |
| Wen       | Int J Clin Pract      | 1-5  | 2011 | 21762310 | 7  | 343  |
| Xu        | Can J Cardiol         | 1-5  | 2014 | 24726092 | 19 | 886  |
| Zhang     | Clin Cardiol          | 1-5  | 2009 | 19685520 | 7  | 660  |
| Zhang     | Int J Cardiol         | 5-10 | 2009 | 18644638 | 6  | 525  |
| Zhang     | Clin Cardiol          | 1-5  | 2010 | 20556805 | 8  | 725  |
| Zhao      | Expert Opin Biol Ther | 1-5  | 2011 | 21981749 | 10 | 422  |
| Zimmet    | Eur J Heart Fail      | 5-10 | 2011 | 22065869 | 29 | 1830 |
| Zohlhöfer | J Am Coll Cardiol     | >10  | 2008 | 18402895 | 10 | 445  |

**Table 2S.** Additional features of included reviews.

| First author (acronym) | Year of publication | Included studies  | Setting | Therapy        | Country of corresponding author | Number of authors |
|------------------------|---------------------|-------------------|---------|----------------|---------------------------------|-------------------|
| Abdel-Latif            | 2007                | Non-RCTs and RCTS | IHD/HF  | BMSC           | USA                             | 9                 |
| Alvarez                | 2012                | Non-RCTs and RCTS | IHD/HF  | Any type of SC | USA                             | 9                 |
| Bai                    | 2010                | RTCs              | AMI     | BMSC           | China                           | 3                 |
| Brunskill              | 2009                | RTCs              | IHD/HF  | BMSC           | UK                              | 5                 |
| Cheng                  | 2013                | RTCs              | IHD/HF  | Any type of SC | China                           | 3                 |
| Clifford               | 2012                | RTCs              | AMI     | BMSC           | UK                              | 8                 |
| de Jong                | 2014                | RTCs              | AMI     | BMSC           | Netherlands                     | 5                 |
| Delewi                 | 2012                | RTCs              | AMI     | BMSC           | Netherlands                     | 6                 |
| Delewi                 | 2013                | RTCs              | AMI     | BMSC           | Netherlands                     | 26                |
| Donndorf               | 2011                | Non-RCTs and RCTS | IHD/HF  | BMSC           | Germany                         | 7                 |
| Fan                    | 2007                | RTCs              | AMI     | G-CSF          | China                           | 4                 |
| Fisher                 | 2013                | RTCs              | IHD/HF  | BMSC           | UK                              | 5                 |
| Fisher                 | 2014                | RTCs              | IHD/HF  | BMSC           | UK                              | 6                 |
| Henry                  | 2007                | RTCs              | IHD/HF  | Other          | USA                             | 8                 |
| Hristow                | 2006                | RTCs              | AMI     | BMSC           | Germany                         | 4                 |
| Ince                   | 2007                | RTCs              | AMI     | G-CSF          | Germany                         | 8                 |
| Jeevanantham           | 2012                | Non-RCTs and RCTS | IHD/HF  | BMSC           | USA                             | 6                 |
| Jiang                  | 2010                | RTCs              | IHD/HF  | Any type of SC | China                           | 14                |
| Jiang                  | 2012                | RTCs              | AMI     | BMSC           | China                           | 3                 |
| Kandala                | 2013                | RTCs              | IHD/HF  | BMSC           | USA                             | 6                 |
| Kang                   | 2007                | RTCs              | IHD/HF  | G-CSF          | China                           | 4                 |
| Kang                   | 2008                | RTCs              | AMI     | BMSC           | China                           | 4                 |
| Kuswardhani            | 2011                | RTCs              | AMI     | BMSC           | China                           | 4                 |
| Li                     | 2013                | RTCs              | IHD/HF  | Any type of SC | China                           | 6                 |
| Lipinski               | 2007                | RTCs              | AMI     | BMSC           | Italy                           | 11                |
| Martin-Rendon          | 2008                | RTCs              | AMI     | BMSC           | UK                              | 6                 |
| Moazzami               | 2013                | RTCs              | AMI     | G-CSF          | USA                             | 3                 |
| Nowbar (DAMASCENE)     | 2014                | RTCs              | IHD/HF  | BMSC           | UK                              | 9                 |
| Singh                  | 2009                | RTCs              | AMI     | BMSC           | USA                             | 7                 |
| Sun                    | 2010                | Non-RCTs and RCTS | AMI     | Any type of SC | China                           | 4                 |
| Takagi                 | 2011                | RTCs              | AMI     | Any type of SC | Japan                           | 2                 |
| Tian                   | 2014                | RTCs              | IHD/HF  | BMSC           | China                           | 5                 |
| Wen                    | 2011                | RTCs              | IHD/HF  | BMSC           | China                           | 5                 |
| Wen                    | 2011                | RTCs              | IHD/HF  | BMSC           | China                           | 4                 |



|            |      |      |        |       |           |   |
|------------|------|------|--------|-------|-----------|---|
| Xu         | 2014 | RTCs | IHD/HF | BMSC  | China     | 5 |
| Zhang      | 2009 | RTCs | AMI    | BMSC  | China     | 9 |
| Zhang      | 2009 | RTCs | AMI    | BMSC  | China     | 7 |
| Zhang      | 2010 | RTCs | AMI    | BMSC  | China     | 9 |
| Zhao       | 2011 | RTCs | IHD/HF | BMSC  | China     | 2 |
| Zimmet     | 2011 | RTCs | AMI    | 2     | Australia | 8 |
| Zohlnhöfer | 2008 | RTCs | AMI    | G-CSF | Germany   | 9 |

AMI=acute myocardial infarction; BMSC=bone marrow-derived stem cell; G-CSF=granulocyte-colony stimulating factor; HF=heart failure; IHD=ischemic heart disease; Non-RCTs=non-randomized clinical trials; RCTs=randomized clinical trials; SC=stem cell

**Table 3S.** Findings, effect estimates and citations of included reviews.

| First author (acronym) | Year of publication | AMSTAR score | Findings                                                                                                                                                                          | Effect estimates for LVEF | Effect estimates for death                                                                                   | Yearly WOS citations |
|------------------------|---------------------|--------------|-----------------------------------------------------------------------------------------------------------------------------------------------------------------------------------|---------------------------|--------------------------------------------------------------------------------------------------------------|----------------------|
| Abdel-Latif            | 2007                | 10           | BMSC are associated with improvements in cardiac function parameters in patients with acute and chronic IHD.                                                                      | 3.66 (1.93 to 5.40)       | NA                                                                                                           | 68,9                 |
| Alvarez                | 2012                | 3            | Most adverse events associated with cell therapy occur during intracoronary infusion and G-CSF administration.                                                                    | NA                        | NA                                                                                                           | 0,0                  |
| Bai                    | 2010                | 9            | BMSC are associated with improvements in cardiac function parameters in patients with AMI, especially in the elderly, diabetics, and women.                                       | 3.79 (2.4 to 5.7)         | NA                                                                                                           | 1,8                  |
| Brunskill              | 2009                | 10           | BMSC are associated with improvements in cardiac function parameters in patients with AMI, especially when delivered with intramyocardial injection and with lower baseline LVEF. | 3.71 (2.15 to 5.26)       | NA                                                                                                           | 5,1                  |
| Cheng                  | 2013                | 9            | Stem cells are not associated with changes in prognosis or cardiac function parameters, but may improve symptoms.                                                                 | 0.02 (-0.31 to 0.35)      | RR=2.27 (0.60-8.62)                                                                                          | 1,4                  |
| Clifford               | 2012                | 11           | BMSC effects on cardiac function parameters seem to be greater in patients with AMI when more than 10 <sup>8</sup> cells are injected and with lower baseline LVEF.               | 3.26 (1.12 to 4.40)       | RR=0.70 (0.40-1.21)                                                                                          | 6,9                  |
| de Jong                | 2014                | 10           | BMSC are not associated with significant effects on prognosis, or MRI-derived cardiac function parameters.                                                                        | 2.10 (0.68 to 3.52)       | OR=0.68 (0.36-1.31) for BMMNC, OR=0.50 (0.09-2.67) for BM progenitor cells, and OR=3.18 (0.13-81.01) for MSC | NA                   |
| Delewi                 | 2012                | 10           | BMSC are associated with improvements in prognosis and cardiac function parameters.                                                                                               | 2.23 (1.00 to 3.47)       | RR=0.60 (0.38-1.08)                                                                                          | 3,5                  |
| Delewi                 | 2013                | #RIF!        | BMSC are associated with improvements in cardiac function parameters, especially in younger patients and those with lower baseline LVEF.                                          | 2.55 (1.83 to 3.26)       | NA                                                                                                           | 6,8                  |
| Donndorf               | 2011                | 10           | BMSC are associated with improvements in cardiac function parameters in patients undergoing CABG.                                                                                 | 5.40 (1.36 to 9.44)       | NA                                                                                                           | 6,2                  |
| Fan                    | 2007                | 10           | G-CSF is not associated with changes in cardiac function parameters in patients with AMI.                                                                                         | 2.27 (-3.41 to 7.94)      | NA                                                                                                           | 2,0                  |
| Fisher                 | 2013                | 9            | BMSC are associated with improvements in prognosis, cardiac function parameters, and symptoms.                                                                                    | 3.47 (1.88 to 5.06)       | RR=0.33 (0.17-0.65)                                                                                          | 4,3                  |

|              |      |    |                                                                                                                                                                                                                                                  |                     |                        |      |
|--------------|------|----|--------------------------------------------------------------------------------------------------------------------------------------------------------------------------------------------------------------------------------------------------|---------------------|------------------------|------|
| Fisher       | 2014 | 11 | According to studies with average to low internal validity, BMSC appear to improve prognosis, cardiac function, and symptoms of chronic heart disease, but effects vary substantially depending on route, baseline LVEF, cell type, and setting. | 4.22 (3.47 to 4.97) | RR=0.28 (0.14-0.53)    | NA   |
| Henry        | 2007 | 5  | Ad5FGF-4 has no overall impact on signs and symptoms in patients with refractory angina, but gender differences may be present.                                                                                                                  | NA                  | NA                     | 10,2 |
| Hristow      | 2006 | 4  | BMSC are associated with improvements in cardiac function parameters in patients with AMI.                                                                                                                                                       | 4.21 (0.21 to 8.22) | NA                     | 5,5  |
| Ince         | 2007 | 5  | G-CSF is not associated with an increase risk of stent restenosis or thrombosis in patients with AMI.                                                                                                                                            | NA                  | NA                     | 2,8  |
| Jeevanantham | 2012 | 9  | BMSC are associated with improvements in prognosis and cardiac function parameters.                                                                                                                                                              | 3.96 (2.90 to 5.02) | OR=0.39 (0.27 to 0.55) | 41,7 |
| Jiang        | 2010 | 9  | Stem cells are associated with improvements in cardiac function parameters in patients with AMI.                                                                                                                                                 | 2.93 (2.05 to 3.81) |                        | 3,5  |
| Jiang        | 2012 | 10 | Intracoronary BMSC are associated with improvements in diastolic function parameters and exercise testing features.                                                                                                                              | NA                  | NA                     | 0,0  |
| Kandala      | 2013 | 9  | BMSC is associated with improvements in cardiac function parameters, especially when administered with intramyocardial injection.                                                                                                                | 4.48 (2.43 to 6.53) | NA                     | 5,1  |
| Kang         | 2007 | 8  | G-CSF is associated with improvements in cardiac function parameters in patients with AMI.                                                                                                                                                       | 3.46 (0.60 to 6.32) | NA                     | 2,6  |
| Kang         | 2008 | 9  | BMSC are associated with improvements in cardiac function parameters in patients with AMI.                                                                                                                                                       | 2.88 (1.69 to 4.08) | NA                     | 6,2  |
| Kuswardhani  | 2011 | 9  | BMSC is associated with improvements in prognosis and cardiac function parameters in patients with AMI.                                                                                                                                          | 3.46 (0.60 to 6.32) | NA                     | NA   |
| Li           | 2013 | 10 | Stem cells are associated with improvements in prognosis and symptoms.                                                                                                                                                                           | NA                  | OR=0.33 (0.08-1.39)    | 2,4  |
| Lipinski     | 2007 | 10 | BMSC are associated with improvements in prognosis and cardiac function parameters in patients with AMI, with meta-regression suggesting an association between injected cell volume and LVEF change.                                            | 2.97 (1.88 to 4.06) | OR=0.52 (0.16-.63)     | 43,4 |

|                    |      |    |                                                                                                                                                                      |                      |                        |      |
|--------------------|------|----|----------------------------------------------------------------------------------------------------------------------------------------------------------------------|----------------------|------------------------|------|
| Martin-Rendon      | 2008 | 10 | BMSC are associated with improvements in cardiac function parameters in patients with AMI.                                                                           | 2.99 (1.26 to 4.72)  | RR=0.62 (0.22-1.76)    | 38,3 |
| Moazzami           | 2013 | 11 | G-CSF is not associated with changes in prognosis, cardiac function parameters, or symptoms.                                                                         | 3.41 (-0.61 to 7.44) | RR=0.64 (0.15 to 2.80) | 0,0  |
| Nowbar (DAMASCENE) | 2014 | 10 | The effect of BMSC on LVEF is associated with number of discrepancies in study reports: studies without discrepancies suggest no clinically relevant effect on LVEF. | 2.91 (1.47 to 4.35)  | NA                     | NA   |
| Singh              | 2009 | 9  | BMSC are associated with improvements in cardiac function parameters in patients with AMI.                                                                           | 6.11 (2.67 to 9.54)  | NA                     | 4,8  |
| Sun                | 2010 | 9  | Stem cells are associated with improvements in cardiac function parameters in patients with AMI.                                                                     | NA                   | NA                     | 3,5  |
| Takagi             | 2011 | 6  | Stem cells are not associated with improvements in cardiac function parameters in patients with AMI.                                                                 | 2.87 (1.95 to 3.78)  | NA                     | 0,3  |
| Tian               | 2014 | 9  | BMSC are associated with improvements in cardiac function parameters, especially in subjects with revascularizable regions.                                          | 4.91 (2.84-6.99)     | NA                     | NA   |
| Wen                | 2011 | 9  | BMSC are associated with improvements in cardiac function parameters.                                                                                                | 3.83 (2.10 to 5.56)  | NA                     | 4,1  |
| Wen                | 2011 | 8  | BMSC are associated with improvements in cardiac function parameters.                                                                                                | 3.72 (1.98 to 5.46)  | NA                     | 1,5  |
| Xu                 | 2014 | 9  | BMSC are associated with improvements in prognosis and cardiac function parameters in patients with chronic IHD and HF.                                              | 3.54 (1.92 to 5.17)  | RR=0.49 (0.29-0.84)    | NA   |
| Zhang              | 2009 | 9  | BMSC transfer 4-7 days post-AMI is associated with improvements in prognosis and cardiac function parameters.                                                        | 4.63 (1.00 to 8.26)  | RR=0.33 (0.09-1.22)    | 5,1  |
| Zhang              | 2009 | 9  | BMSC are associated with improvements in cardiac function parameters in patients with AMI.                                                                           | 4.77 (1.42 to 8.12)  | NA                     | 3,6  |
| Zhang              | 2010 | 9  | BMSC are associated with improvements in prognosis and cardiac function parameters, especially in younger patients and those receiving BMSC 6-7 days post-AMI.       | 4.37 (2.66 to 6.08)  | RR=0.33 (0.13-0.89)    | 2,7  |
| Zhao               | 2011 | 9  | BMSC are associated with improvements in cardiac function parameters which may depend on primary intervention, route, cell type, and baseline LVEF.                  | 4.59 (2.22 to 6.95)  | NA                     | 0,6  |

|           |      |   |                                                                                               |                                                                  |                                                                 |      |
|-----------|------|---|-----------------------------------------------------------------------------------------------|------------------------------------------------------------------|-----------------------------------------------------------------|------|
| Zimmer    | 2011 | 9 | BMSC and G-CSF are associated with improvements in prognosis and cardiac function parameters. | 2.70 (1.48 to 3.92) for BMSC, and 2.81 (-1.49 to 7.11) for G-CSF | OR=1.16 (0.40-3.57) for BMSC, and OR=1.69 (0.19-20.5) for G-CSF | 7,6  |
| Zohlhöfer | 2008 | 7 | G-CSF is not associated with changes in cardiac function parameters in patients with AMI.     | 1.32 (-1.52 to 4.16)                                             | NA                                                              | 11,4 |

## ONLINE FIGURES

**Figure 1S.** Trend in the number of included studies over time. Each square represents a single systematic review.

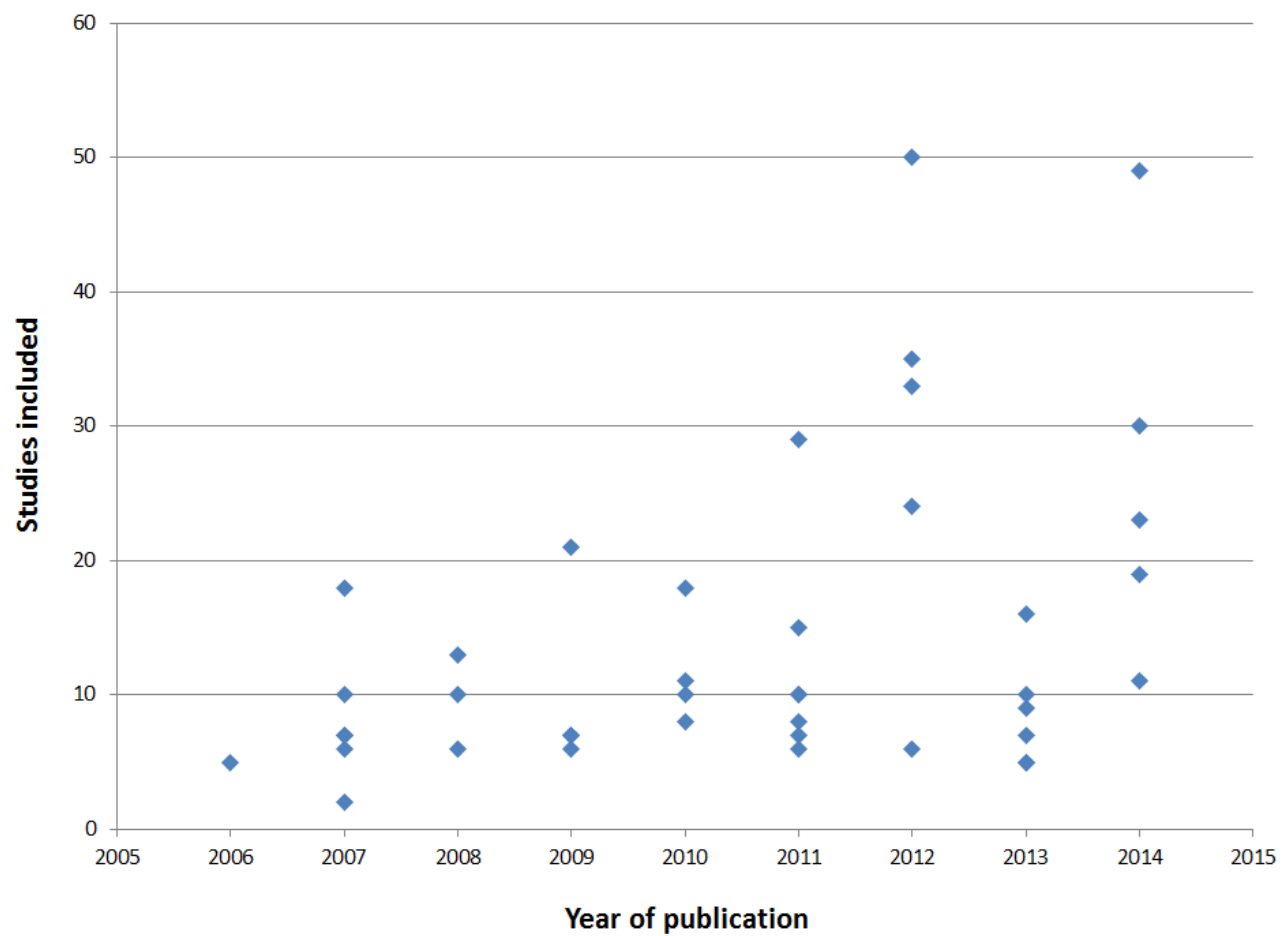

Supplement: f1 [file 613782.f1.pdf]
